# Supplementary material for: Distinct Mesenchymal Alterations in N-Cadherin and E-Cadherin Positive Primary Renal Epithelial Cells
Source: PubMed Central journal article supplement (PMC3422254; doi:10.1371/journal.pone.0043584), 2012-08-17
Supplement: pone.0043584.s001.pdf [file pone.0043584.s001.pdf]

## Supplementary Figure S1

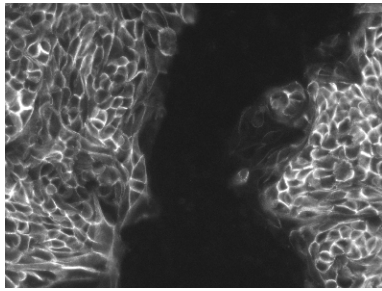

**E-Cadherin**

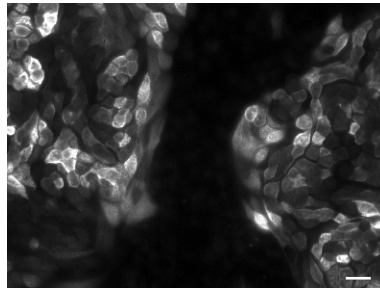

**Peanut Agglutinin**

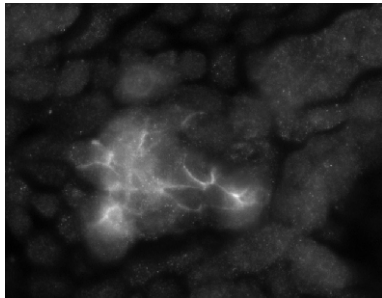

**N-Cadherin**

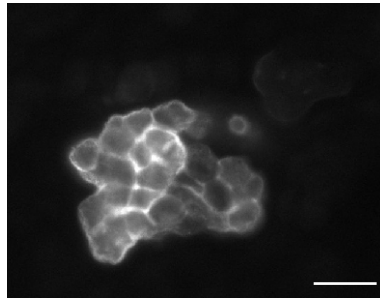

**Aminopeptidase N**
