# Supplementary material for: Distinct Mesenchymal Alterations in N-Cadherin and E-Cadherin Positive Primary Renal Epithelial Cells
Source: PubMed Central journal article supplement (PMC3422254; doi:10.1371/journal.pone.0043584), 2012-08-17

### Supplementary Figure S5

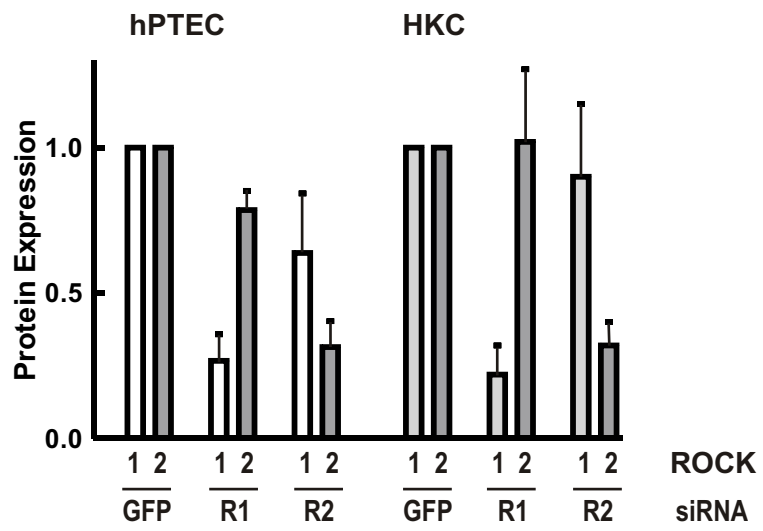

Supplement: pone.0043584.s005.pdf [file pone.0043584.s005.pdf]
