# Supplementary material for: Distinct Mesenchymal Alterations in N-Cadherin and E-Cadherin Positive Primary Renal Epithelial Cells
Source: PubMed Central journal article supplement (PMC3422254; doi:10.1371/journal.pone.0043584), 2012-08-17
Supplement: pone.0043584.s006.pdf [file pone.0043584.s006.pdf]

## Supplemental Table 1

### Supplemental Table 1A: Antibodies used for Western blotting:

|                       |        |                |
|-----------------------|--------|----------------|
| E-cadherin            | rabbit | Cell Signaling |
| N-cadherin            | rabbit | Santa Cruz     |
| ROCK1                 | mouse  | Santa Cruz     |
| ROCK2                 | rabbit | Santa Cruz     |
| Vinculin              | rabbit | Santa Cruz     |
| Fibronectin - HFN 7.1 | mouse  | DSHB           |
| Tubulin               | mouse  | Sigma          |

Santa Cruz, Heidelberg, Germany:

Cell Signaling, Danvers, MA, USA

Sigma Sigma-Aldrich, Munich, Germany

DSHB: Developmental Studies Hybridoma Bank, The University of Iowa, Department of Biology, Iowa City, IA 52242.

HRP-conjugated secondary antibodies were from GE Healthcare Bio-Sciences, Uppsala, Sweden.

### Supplemental Table 1B: siRNAs

|       |                                 |            |
|-------|---------------------------------|------------|
| ROCK1 | Sense 5'-CCAGGAAGGUAUAUGCUAU-3' | Eurogentec |
|       | esiRNA human ROCK1 (HU-03470-1) | Sigma      |
| ROCK2 | Sense 5'-GGAGAUUACCUUACGGAAA-3' | Eurogentec |
|       | esiRNA human ROCK2 (HU-03013-1) | Sigma      |
| GFP   | Sense 5'-GGUGUGCUGUUUGGAGGUC-3' | Eurogentec |

Eurogentec, Liege, Belgium

Sigma-Aldrich, Munich, Germany

### Supplemental Table 1C: Primers used for RT-PCR

|            |                             |                           |
|------------|-----------------------------|---------------------------|
|            | Sense primer, 5' – 3'       | antisense primer, 5' – 3' |
| E-Cadherin | CAT TGC CAC ATA CAC TCT CTT | TGC ATT CCC GTT GGA TGA C |

|            |                                       |                                      |
|------------|---------------------------------------|--------------------------------------|
|            | CTC TC                                |                                      |
| N-Cadherin | CCC TGC TTC AGG CGT CTG TA            | TGC TTG CAT AAT GCG ATT<br>TCA CC    |
| Snail      | GGA AGC CTA ACT ACA GCG<br>AGC T      | GCT GGA AGG TAA ACT CTG<br>GAT TAG A |
| Slug       | AAG GAC ACA TTA GAA CTC<br>ACA CGG    | TGC AGT GAG GGC AAC AAA<br>AAG       |
| ZEB1       | GAA AGA GAA GGG AAT GCT<br>AAG AAC TG | CTT GCC CTT CCT TTC TGT CAT<br>C     |
| ZEB2       | GCA CAA GAC TAC ATG TCA<br>GGC C      | CAC ACT GAT AGG GCT TCT<br>CGC       |
| 18S        | TTG ATT AAG TCC CTG CCC TTT<br>GT     | CGA TCC GAG GGC CTC ACT A            |

**Supplemental Table 1D: Antibodies used for immunocytochemistry**

|                                |        |             |
|--------------------------------|--------|-------------|
| E-cadherin                     | mouse  | Abcam       |
| N-cadherin                     | rabbit | Santa Cruz  |
| Paxillin                       | mouse  | Santa Cruz  |
| Fibronectin - HFN 7.1          | mouse  | DSHB        |
| Acetylated tubulin             | mouse  | Sigma       |
| Rhodamine-phalloidin           |        | Invitrogen  |
| FITC-labeled CD13              | mouse  | Immunotools |
| FITC-labeled Peanut agglutinin |        | Sigma       |

Abcam, Cambridge, UK

Santa Cruz, Heidelberg, Germany

Sigma-Aldrich, Munich, Germany

Invitrogen, Karlsruhe, Germany

DSHB: Developmental Studies Hybridoma Bank, The University of Iowa, Department of Biology, Iowa City, IA 52242.

Immunotools, Friesoythe, Germany

Secondary Alexa Fluor 488- or -555-conjugated antibodies were from Invitrogen, Karlsruhe, Germany.
